# Supplementary figures and images for: Wnt/β-Catenin Signaling Activation beyond Robust Nuclear β-Catenin Accumulation in Nondysplastic Barrett’s Esophagus: Regulation via Dickkopf-1
Source: PubMed Central journal article supplement — Neoplasia. 2015 Aug 18;17(7):598–611. doi: 10.1016/j.neo.2015.07.006 (PMC4547437; doi:10.1016/j.neo.2015.07.006), 2015-08-18

**A**

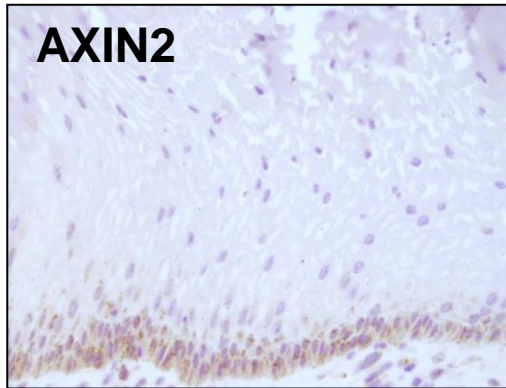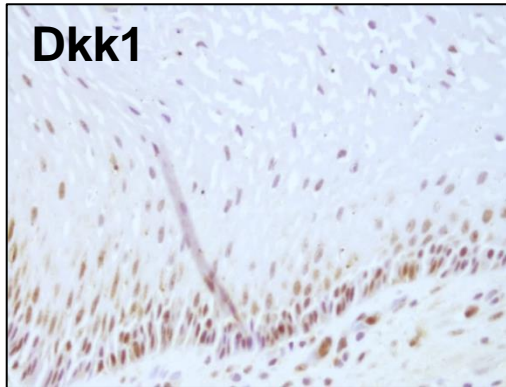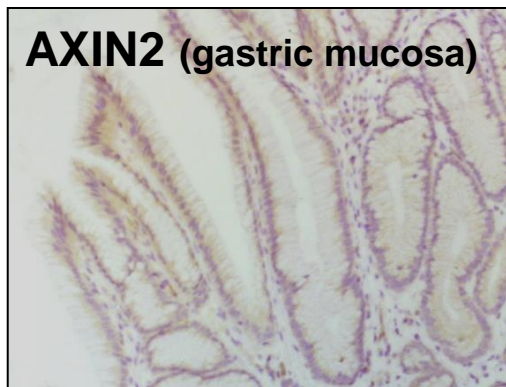

**B**

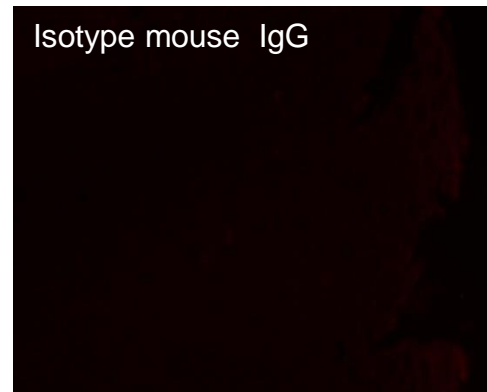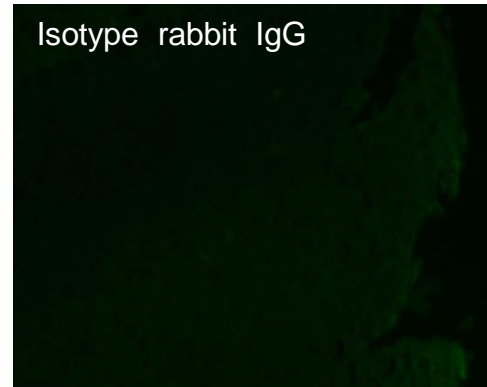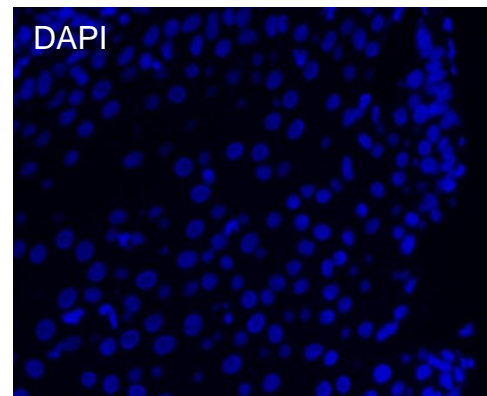

Supplement: mmc1.pdf [file mmc1.pdf]

**A**

Cytokeratin 4 - Cytokeratin 8/18 - DAPI

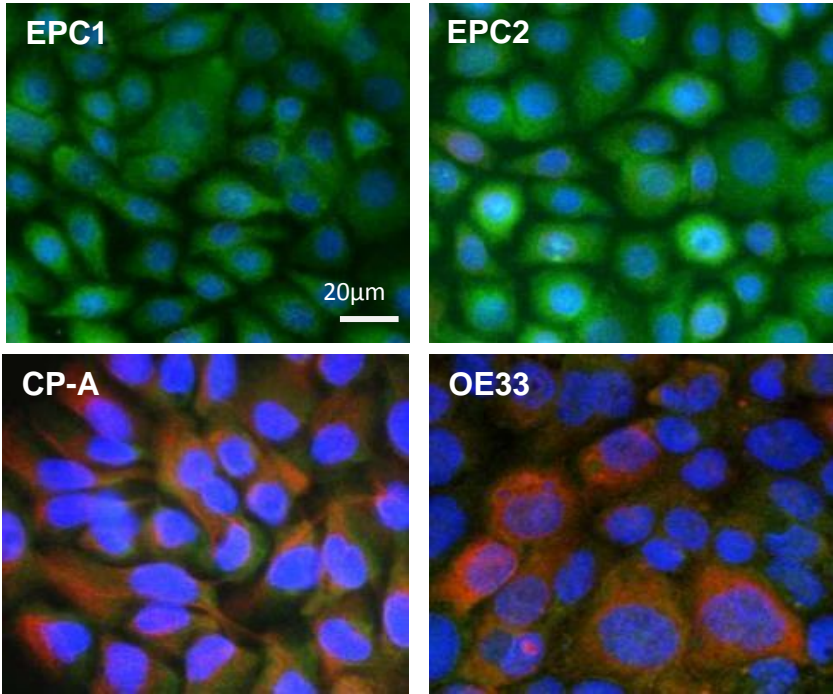**B**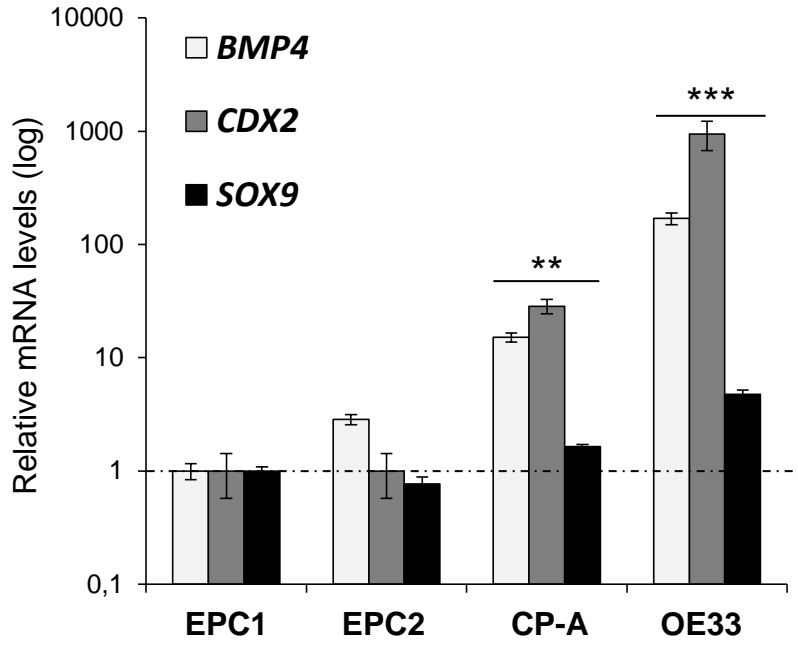

Supplement: mmc2.pdf [file mmc2.pdf]
